# Supplementary material
Source: PubMed Central journal article supplement (PMC2785558)
Supplement: supp_M109.029926_jbc.M109.029926-1.pdf [file supp_M109.029926_jbc.M109.029926-1.pdf]

## Data analysis

1] Movies were recorded using an EMCCD camera in 3x3 pixel, typically each movie lasted for about 1-2 mins.

2] The movies were converted into fluorescent traces using codes written in IDL.

3] The traces were analyzed by manual visual inspection. Traces with defined steps were taken into account and the more noisy traces were omitted. On average about 60% of traces were useful.

4] The data were normalized as follows:

In X number of movies, Y number of traces were analyzed out of which say Z is the number of a given species observed. Normalization of events= $Z/Y$

**Table 1:** Summary of data. The number inside the parenthesis is the normalized value of the events for that species and the population of hexamer is indicated as % of all species.

| <b>Control Data</b>                    | <b>Gp59</b> | <b>Gp59+gp32</b> | <b>Gp59+gp41</b> | <b>Gp59+gp32+gp41</b> |
|----------------------------------------|-------------|------------------|------------------|-----------------------|
| <b>Monomer</b>                         | 562(0.64)   | 861(0.715)       | 653(0.617)       | 471(0.649)            |
| <b>Dimer</b>                           | 308(0.352)  | 334(0.277)       | 323(0.306)       | 255(0.351)            |
| <b>Trimer</b>                          | 7(0.008)    | 3(0.002)         | 81(0.076)        | 0.0                   |
| <b>Tetramer</b>                        | 0.0         | 6(0.005)         | 0.0              | 0.0                   |
| <b>Total no. of complexes analyzed</b> | 876         | 1204             | 1057             | 726                   |

| <b>Data with forked DNA</b>            | <b>Gp59</b>    | <b>Gp59<br/>+gp32</b> | <b>Gp59<br/>+gp41</b> | <b>Gp59<br/>+gp32+gp41</b> | <b>Gp59*</b>    | <b>Gp59*<br/>+gp32</b> | <b>Gp59*<br/>+gp41</b> | <b>Gp59*<br/>+gp32+gp41</b> |
|----------------------------------------|----------------|-----------------------|-----------------------|----------------------------|-----------------|------------------------|------------------------|-----------------------------|
| <b>Monomer</b>                         | 990<br>(0.473) | 1503<br>(0.622)       | 1197<br>(0.429)       | 1091<br>(0.437)            | 1174<br>(0.419) | 1431<br>(0.615)        | 1153<br>(0.481)        | 1117<br>(0.437)             |
| <b>Dimer</b>                           | 671<br>(0.32)  | 590<br>(0.244)        | 956<br>(0.343)        | 784<br>(0.314)             | 875<br>(0.312)  | 664<br>(0.285)         | 707<br>(0.295)         | 802<br>(0.314)              |
| <b>Trimer</b>                          | 234<br>(0.112) | 55<br>(0.024)         | 391<br>(0.14)         | 406<br>(0.162)             | 451<br>(0.161)  | 191<br>(0.082)         | 325<br>(0.136)         | 415<br>(0.162)              |
| <b>Tetramer</b>                        | 75<br>(0.036)  | 54<br>(0.022)         | 114<br>(0.041)        | 63<br>(0.025)              | 128<br>(0.046)  | 21<br>(0.009)          | 113<br>(0.0467)        | 65<br>(0.025)               |
| <b>Pentamer</b>                        | 43<br>(0.02)   | 161<br>(0.067)        | 42<br>(0.015)         | 52<br>(0.021)              | 55<br>(0.02)    | 13<br>(0.006)          | 29<br>(0.012)          | 54<br>(0.021)               |
| <b>Hexamer</b>                         | 86<br>4.1%     | 54<br>2.2%            | 90<br>3.2%            | 100<br>4%                  | 120<br>4.3%     | 20<br>1%               | 61<br>2.5%             | 112<br>4.4%                 |
| <b>Total no. of complexes analyzed</b> | 2099           | 2415                  | 2790                  | 2497                       | 2803            | 2340                   | 2388                   | 2565                        |

\* indicates gp59 labelled with Alexa555.
